# Supplementary material
Source: PubMed Central journal article supplement (PMC4706117)

Rescue of neurodegeneration in the Fig4 null mouse by a catalytically inactive FIG4 transgene

Guy M. Lenk<sup>1</sup>, Christen M. Frei<sup>1</sup>, Ashley C. Miller<sup>1</sup>, Rachel C. Wallen<sup>1</sup>,  
Yevgeniya A. Mironova<sup>2</sup>, Roman J. Giger<sup>2,3</sup> and Miriam H. Meisler<sup>1,3</sup>

Departments of 1Human Genetics, 2Cell and Developmental Biology, and 3Neurology,  
University of Michigan, Ann Arbor MI 48109-5618

Supplemental figure 1: The western blot used for quantification of FIG4 protein from transgenic mice.

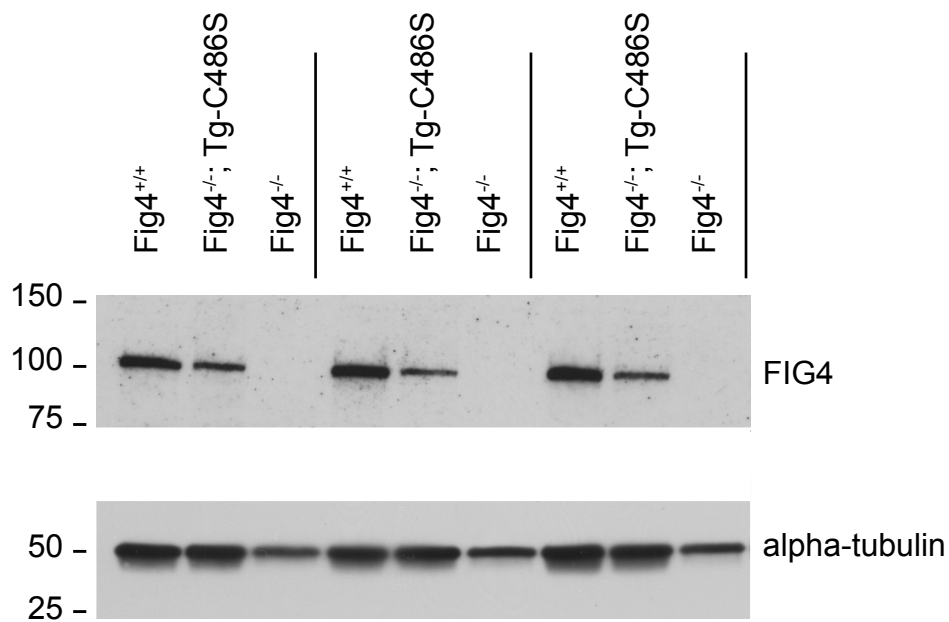

Supplement: supp_ddv480_ddv480supp.pdf [file supp_ddv480_ddv480supp.pdf]
